# Supplementary material for: Optimal film thickness and Sn oxidation state of sputter-deposited SnO2 electron transport layers for efficient perovskite solar cells
Source: Royal Society of Chemistry journal article supplement (doi:10.1039/d4se00911h), 2024-01-01
Supplement: d4se00911h1.pdf [file d4se00911h1.pdf]

## Electronic Supplementary Information

### Optimal film thickness and Sn oxidation state of sputter-deposited SnO<sub>2</sub> electron transport layers for efficient perovskite solar cells

Woo Seok Suh,<sup>□a</sup> Geon Ho Park,<sup>□a</sup> Song Hyeun Jung,<sup>a</sup> Yu-Na Lee,<sup>a</sup> Hui-Seon Kim,<sup>\*a</sup> Jia-  
Hong Pan<sup>\*b</sup> and Wan In Lee<sup>\*a</sup>

<sup>a</sup> *Department of Chemistry and Chemical Engineering, Inha University, Incheon 22212, Korea*

<sup>b</sup> *State Key Laboratory of Featured Metal Materials and Life-Cycle Safety for Composite Structures, School of Resources, Environment and Materials, Guangxi University, Nanning 530004, Guangxi, China*

\* Corresponding authors

H.-S. Kim E-mail: hui-seon.kim@inha.ac.kr; J.-H. Pan:E-mail jhpan@gxu.edu.cn; W. I.

Lee E-mail: wanin@inha.ac.kr

† These authors contributed equally.

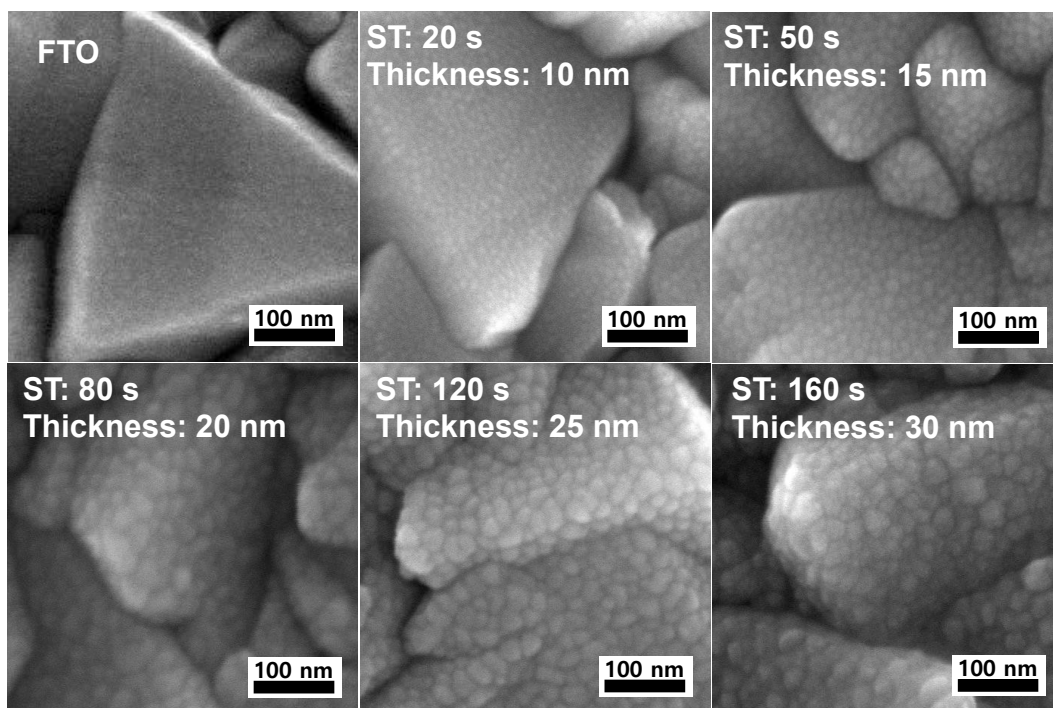

**Fig. S1** Plan-view SEM images of metallic Sn films with various thicknesses deposited on FTO substrate. Thicknesses of the films were controlled by varying the sputtering time (ST).

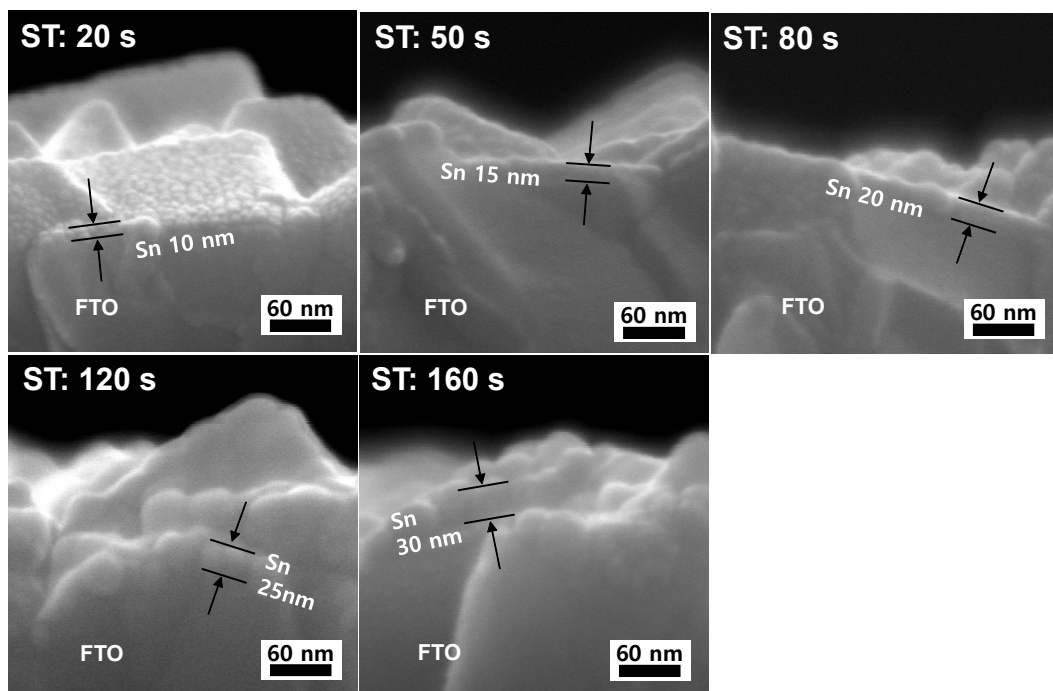

**Fig. S2** Cross-sectional-view SEM images of metallic Sn films with various thicknesses deposited on FTO substrate. Thicknesses of the films were controlled by varying ST.

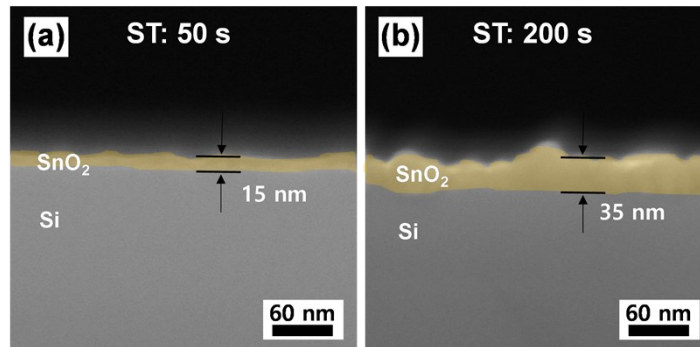

**Fig. S3** Cross-sectional-view SEM images of the SnO<sub>2</sub> films on a Si substrate prepared by the ST of 50 s (a) and 200 s (b).

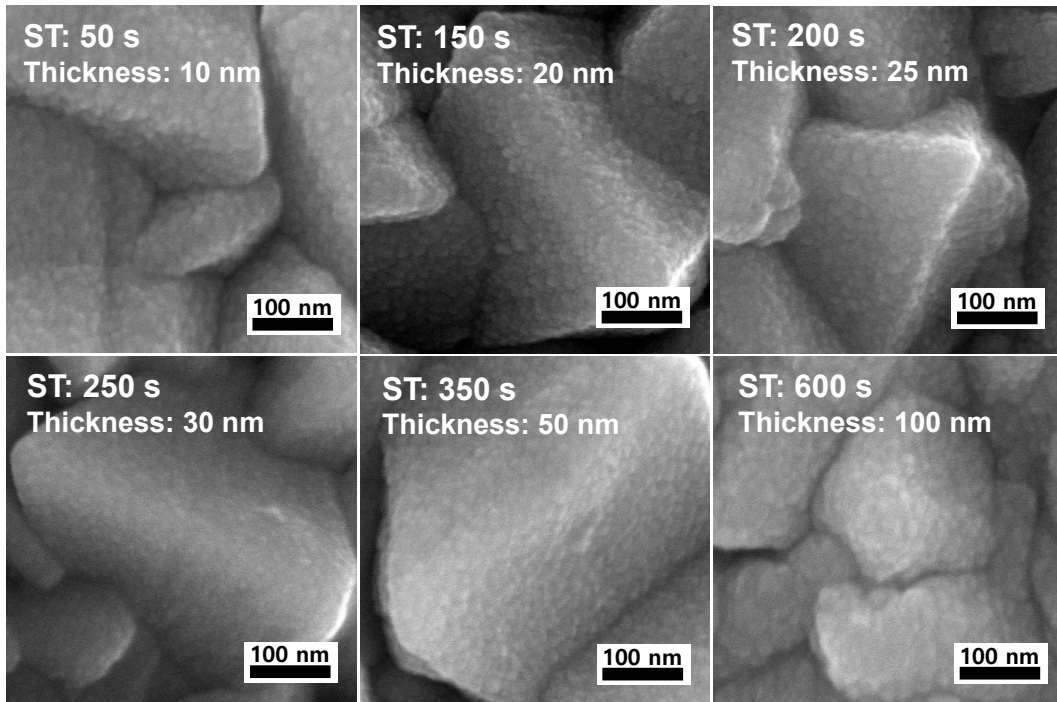

**Fig. S4** Plan-view SEM image of TiO<sub>2</sub> films with various thicknesses deposited on FTO substrate. They were obtained by sputtering metallic Ti films, followed by heat treating at 500°C in air. To control Ti thickness, ST was varied in the range of 50–550 s.

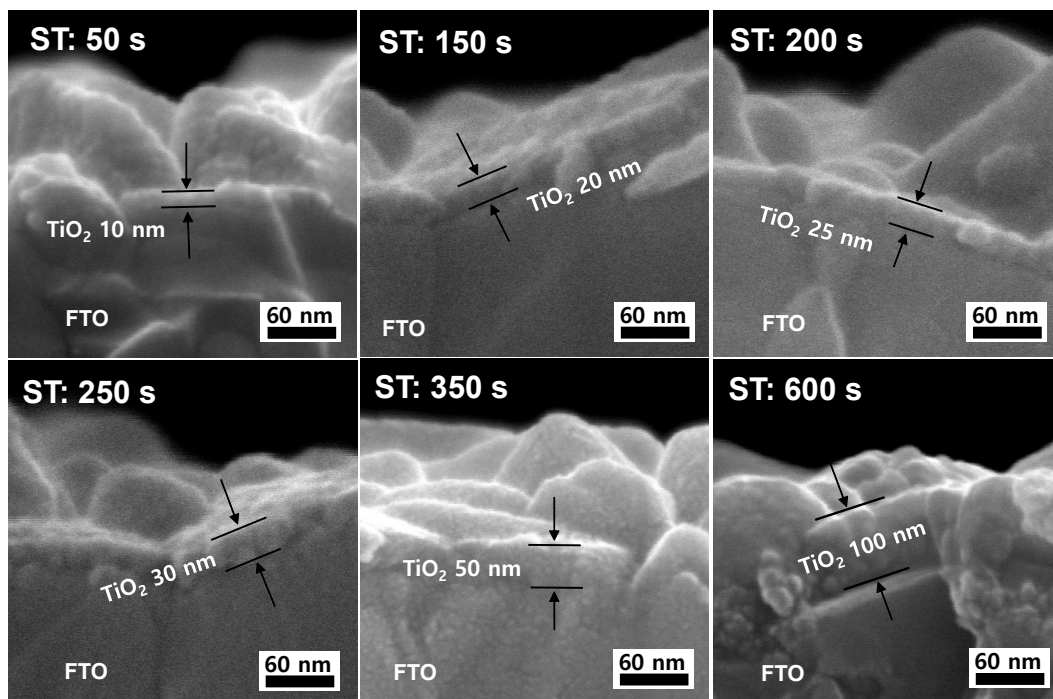

**Fig. S5** Cross-sectional-view SEM image of TiO<sub>2</sub> films with various thicknesses deposited on FTO substrate. They were obtained by sputtering metallic Ti films, followed by heat treating at 500°C in air. To control Ti thickness, ST was varied in the range of 50–550 s.

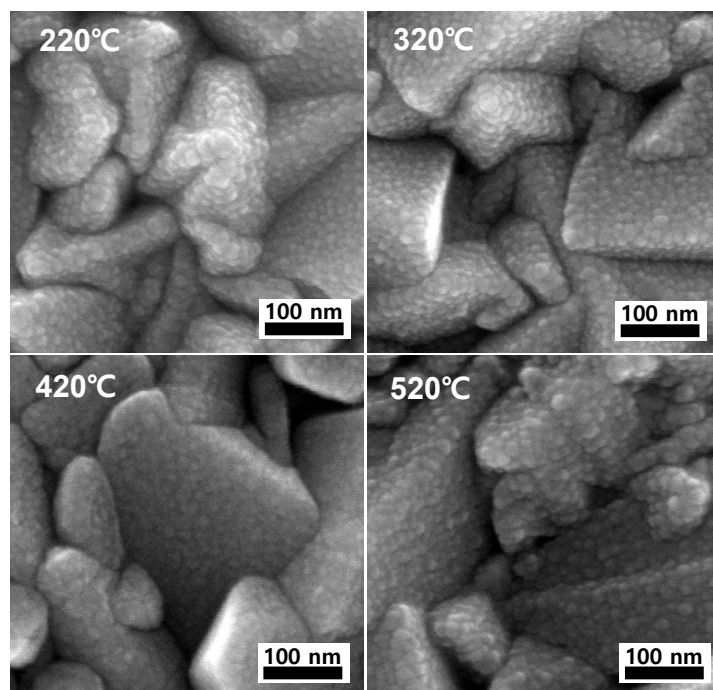

**Fig. S6** Plan-view SEM images of SnO<sub>2</sub> films prepared by heat-treating 15 nm-thick metallic Sn films at various temperatures.

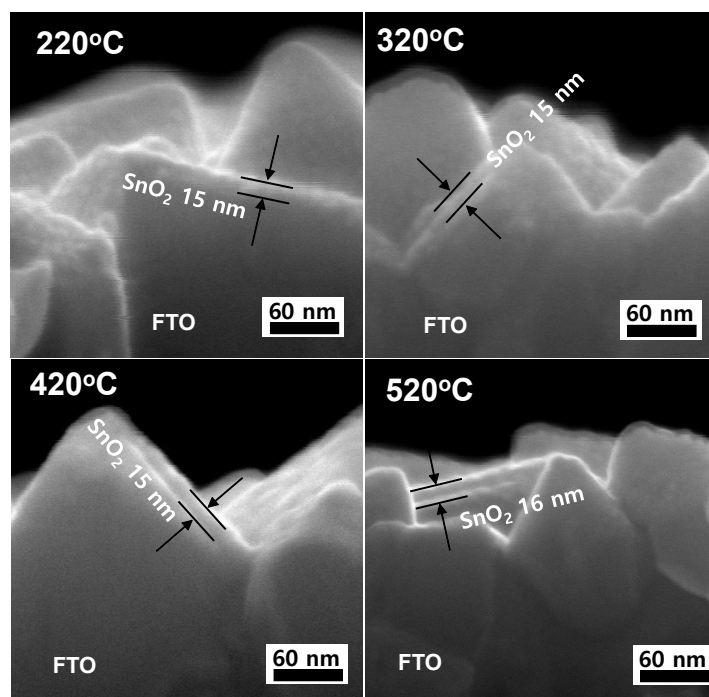

**Fig. S7** Cross-sectional-view SEM images of SnO<sub>2</sub> films prepared by heat-treating 15 nm-thick metallic Sn films at various temperatures.



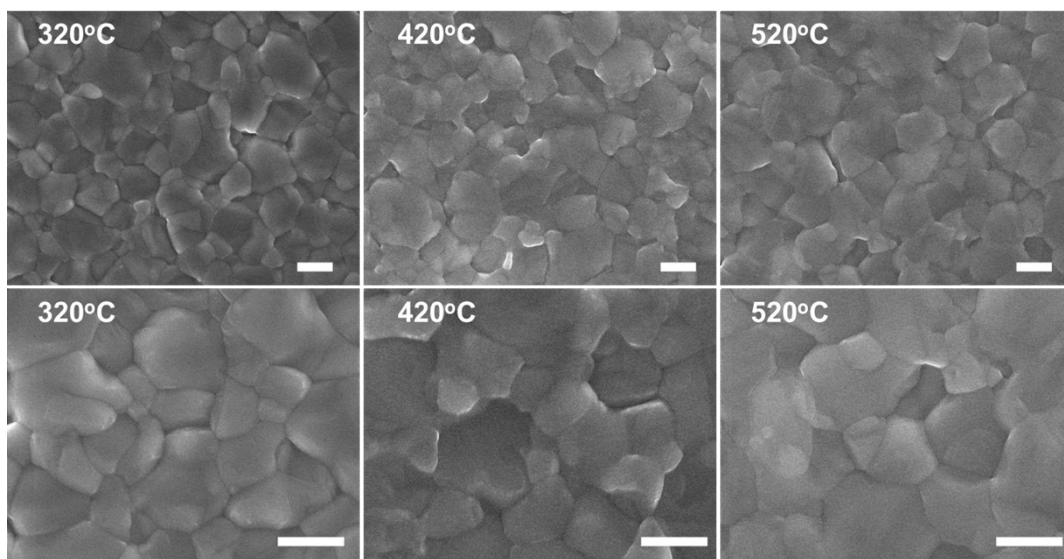

**Fig. S8** Plan-view SEM images of perovskite films grown on the SnO<sub>2</sub> layers heat-treated at 320°C, 420°C, and 520°C, respectively. All scale bars represent 1 μm.

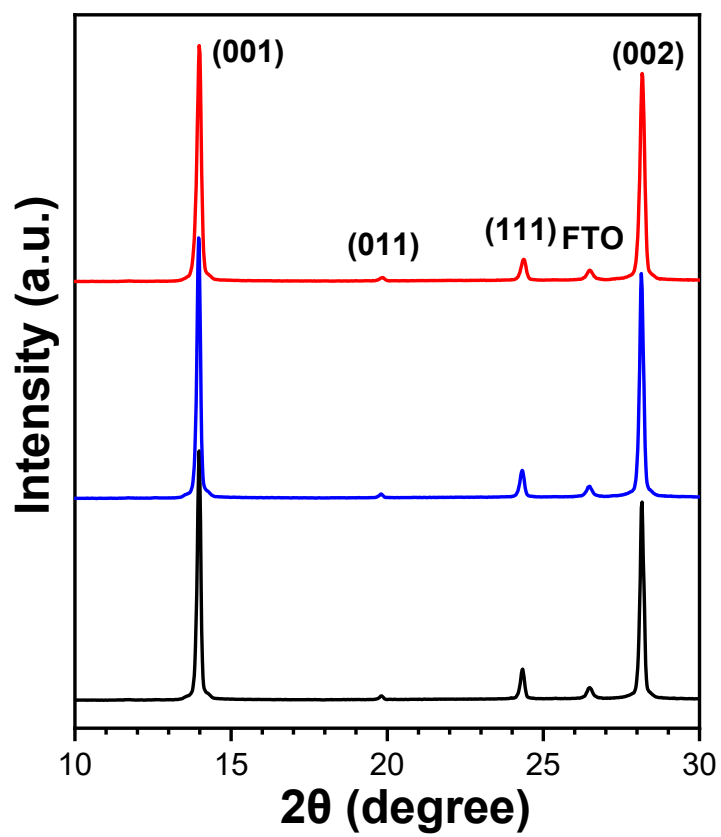

**Fig. S9** XRD patterns of perovskite films grown on the SnO<sub>2</sub> layers heat-treated at 20°C (black), 420°C (blue), and 520°C (red).

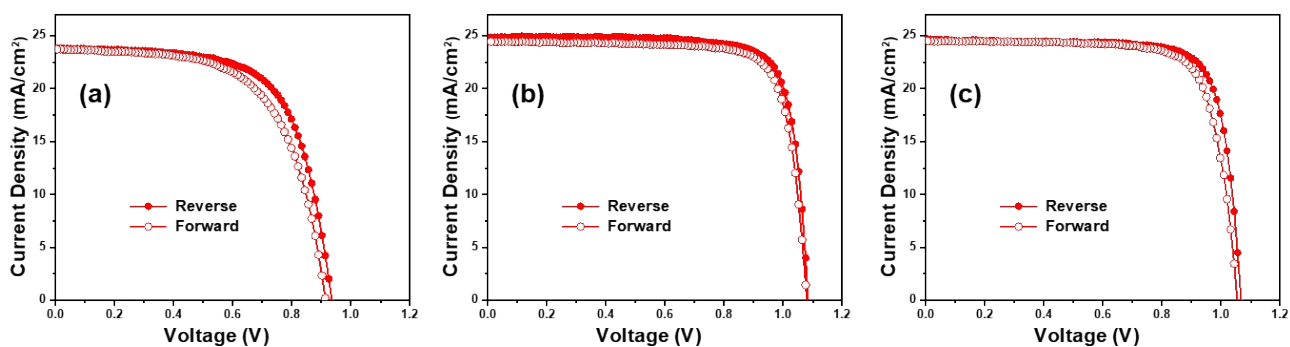

| (d) | SnO <sub>2</sub> ETL annealing Temp. (°C) | Reverse /Forward | V <sub>oc</sub> (V) | J <sub>sc</sub> (mA/cm <sup>2</sup> ) | Fill Factor (%) | PCE (%) | Hysteresis index (%) |
|-----|-------------------------------------------|------------------|---------------------|---------------------------------------|-----------------|---------|----------------------|
|     | 320                                       | Reverse          | 0.935               | 23.79                                 | 69.63           | 15.49   | 10.5                 |
|     |                                           | Forward          | 0.916               | 23.72                                 | 63.85           | 13.87   |                      |
|     | 420                                       | Reverse          | 1.079               | 24.89                                 | 79.31           | 21.30   | 3.6                  |
|     |                                           | Forward          | 1.076               | 24.45                                 | 78.08           | 20.54   |                      |
|     | 520                                       | Reverse          | 1.066               | 24.66                                 | 78.30           | 20.58   | 4.6                  |
|     |                                           | Forward          | 1.054               | 24.47                                 | 76.14           | 19.64   |                      |

**Fig. S10** J-V curves of PSC-SnO<sub>2</sub>-320 (a), PSC-SnO<sub>2</sub>-420 (b), and PSC-SnO<sub>2</sub>-520 (c) obtained from reverse and forward scans (scan rate: 50 mV s<sup>-1</sup>). (d) Table exhibiting PV parameters and hysteresis indexes of various PSC devices. Hysteresis index was evaluated from the equation of  $[(PCE_{\text{reverse}} - PCE_{\text{forward}})/PCE_{\text{reverse}}] \times 100\%$ .

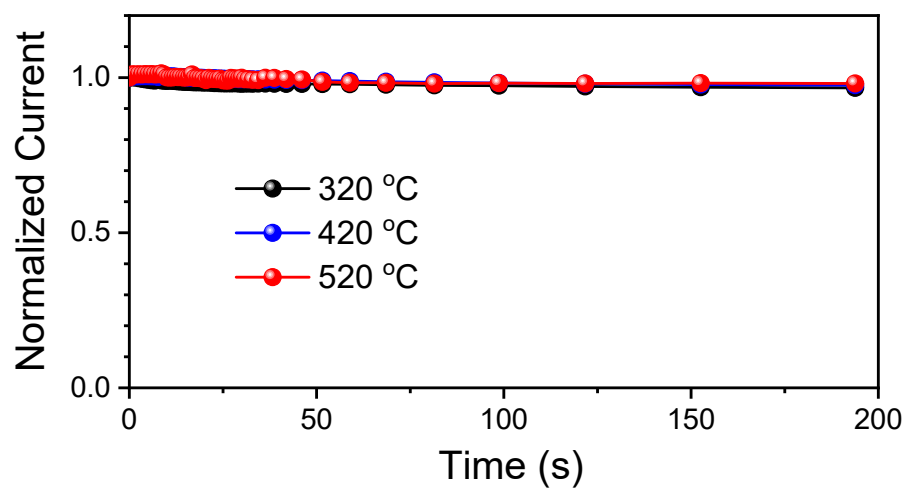

**Fig. S11** Normalized current of PSC-SnO<sub>2</sub>-320 (black), PSC-SnO<sub>2</sub>-420 (blue), and PSC SnO<sub>2</sub> (red) at an applied bias voltage of 0.6 V under one sun irradiation.

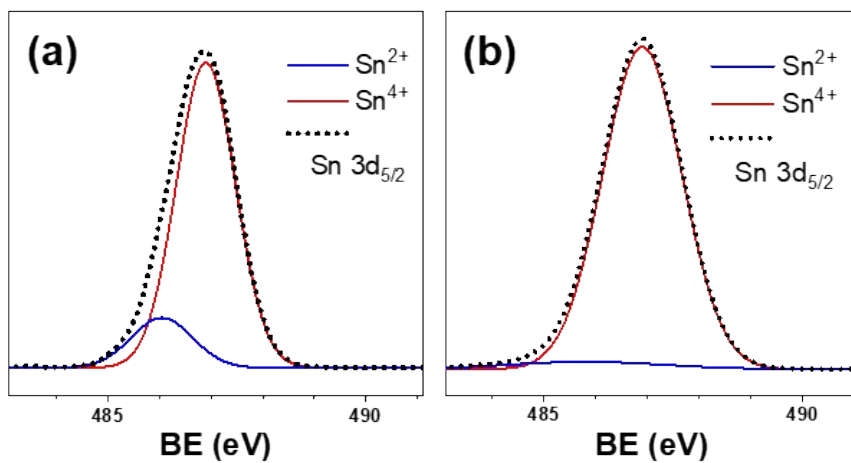

**Fig. S12** XPS spectra of Sn 4d<sub>5/2</sub> peaks for the 35 nm-thick SnO<sub>2</sub> films heat-treated at 420°C (a) and 520°C (b) for 30 min.

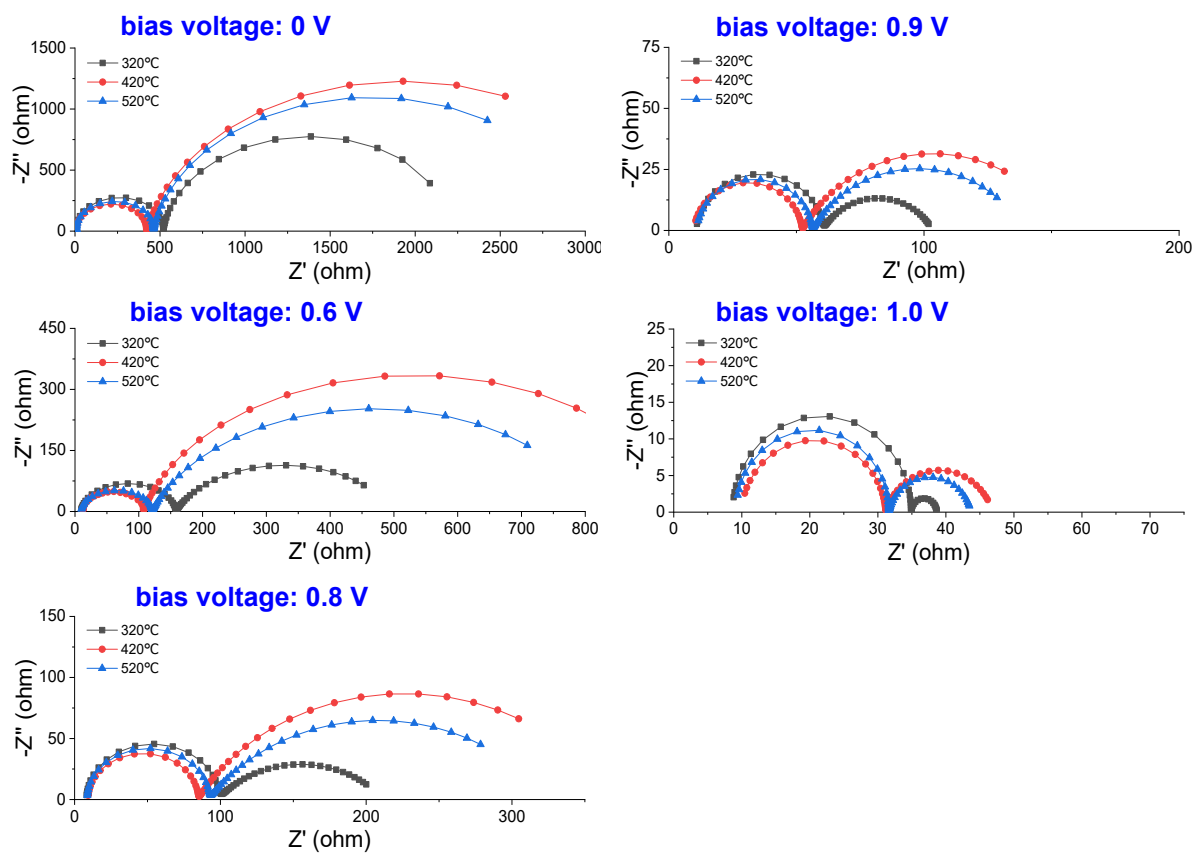

**Fig. S13** Nyquist plots obtained at various bias voltages for PSC devices employing  $\text{SnO}_2$ -320,  $\text{SnO}_2$ -420, and  $\text{SnO}_2$ -520, respectively.
